# Supplementary material for: Neighbourhood material deprivation and severe maternal morbidity: a population-based cohort study in Ontario, Canada
Source: HighWire-hosted journal article supplement (doi:10.1136/bmjopen-2020-046174), 2021-10-01
Supplement: bmjopen-2020-046174supp001_data_supplement.pdf [file bmjopen-2020-046174supp001_data_supplement.pdf]

**Neighbourhood material deprivation and severe maternal morbidity: A population-based cohort study in Ontario, Canada**  
Snelgrove JW et al.

## Supplementary Appendix 1. Data sources for project

### Discharge Abstract Database (DAD)

The DAD is compiled by the Canadian Institute for Health Information and contains administrative, clinical (diagnoses and procedures/interventions), demographic, and administrative information for all admissions to acute care hospitals, rehab, chronic, and day surgery institutions in Ontario. At ICES, consecutive DAD records are linked together to form 'episodes of care' among the hospitals to which patients have been transferred after their initial admission.

### MOMBABY

The ICES MOMBABY Database is an ICES-derived cohort that links the DAD inpatient admission records of delivering mothers and their newborns. From 2002 onward, this linkage is performed deterministically using a maternal-newborn chart matching number. Prior to 2002, mothers were linked to their children by matching on the institutions they were admitted, their postal codes, and their admission/discharge dates.

### Registered Persons Database (RPDB)

The RPDB provides basic demographic information (age, sex, location of residence, date of birth, and date of death for deceased individuals) for those issued an Ontario health insurance number. The RPDB also indicates the time periods for which an individual was eligible to receive publicly funded health insurance benefits and the best known

### Ontario Health Insurance Plan (OHIP)

The OHIP claims database contains information on inpatient and outpatient services provided to Ontario residents eligible for the province's publicly funded health insurance system by fee-for-service health care practitioners (primarily physicians) and "shadow billings" for those paid through non-fee-for-service payment plans. The main data elements include patient and physician identifiers (encrypted), code for service provided, date of service, associated diagnosis, and fee paid.

### Immigration, Refugees, and Citizenship Canada's (IRCC) Permanent Resident Database

The Ontario portion of the IRCC Permanent Resident Database includes immigration application records for people who initially applied to land in Ontario since 1985. The dataset contains permanent residents' demographic information such as country of citizenship, level of education, mother tongue, and landing date. New immigrants who are currently residing in Ontario but originally landed in another province are not captured in this dataset.

### Ontario Marginalization Index (ONMARG)

ONMARG is a geographically (census) based index developed to quantify the degree of marginalization occurring across the province of Ontario. It is comprised of four major dimensions thought to underlie the construct of marginalization: residential instability, material deprivation, dependency, and ethnic concentration. The dataset contains census divisions (CD), census tracts (CT), census subdivisions (CSD), consolidated municipal service manager areas (CMSM), public health units (PHU), local health integration networks (LHIN), sub-LHINs, and dissemination areas (DA).

These datasets were linked using unique encoded identifiers and analyzed at ICES.

The dataset from this study is held securely in coded form at ICES. While data sharing agreements prohibit ICES from making the dataset publicly available, access may be granted to those who meet pre-specified criteria for confidential access, available at [www.ices.on.ca/DAS](http://www.ices.on.ca/DAS). The full dataset creation plan and underlying analytic code are available from the authors upon request, understanding that the computer programs may rely upon coding templates or macros that are unique to ICES and are therefore either inaccessible or may require modification.

**Neighbourhood material deprivation and severe maternal morbidity: A population-based cohort study in Ontario, Canada**  
*Snelgrove JW et al.*

**Inclusion/Exclusion Criteria**

| Concept                                                                | Data Sources | Code Type                                                | Window                                     | Notes<br>(including Dataset references)                                                                                                                                                                                                                                                                                                 |
|------------------------------------------------------------------------|--------------|----------------------------------------------------------|--------------------------------------------|-----------------------------------------------------------------------------------------------------------------------------------------------------------------------------------------------------------------------------------------------------------------------------------------------------------------------------------------|
| <b>Inclusion Criteria</b>                                              |              |                                                          |                                            |                                                                                                                                                                                                                                                                                                                                         |
| Hospital birth (live or stillbirth) at gestational age $\geq 20$ weeks | DAD, MOMBABY | ICD-10 main patient service code for "Obstetrical birth" | Accrual window: 1 April 2002 – 17 Feb 2018 | Canadian Institute for Health Information Discharge Abstract Database (DAD, linked to newborn record in MOMBABY dataset)<br>See:<br><a href="https://datadictionary.ices.on.ca/Applications/DataDictionary/Library.aspx?Library=MOMBABY">https://datadictionary.ices.on.ca/Applications/DataDictionary/Library.aspx?Library=MOMBABY</a> |
| <b>Exclusion Criteria</b>                                              |              |                                                          |                                            |                                                                                                                                                                                                                                                                                                                                         |
| Missing or invalid IKN                                                 | RPDB         |                                                          | Index date                                 | Registered Persons Database<br>See:<br><a href="https://datadictionary.ices.on.ca/Applications/DataDictionary/Library.aspx?Library=RPDB">https://datadictionary.ices.on.ca/Applications/DataDictionary/Library.aspx?Library=RPDB</a>                                                                                                    |
| MOMBABY linkage warning                                                | MOMBABY      |                                                          | Index date                                 |                                                                                                                                                                                                                                                                                                                                         |
| Missing or invalid age (<10 or >55)                                    | RPDB         |                                                          | Index date                                 |                                                                                                                                                                                                                                                                                                                                         |
| Missing or invalid sex                                                 | RPDB         |                                                          | Index date                                 |                                                                                                                                                                                                                                                                                                                                         |
| Death before the index date                                            | RPDB         |                                                          | Index date                                 |                                                                                                                                                                                                                                                                                                                                         |
| Non-Ontario residents / invalid OHIP number                            | RPDB         |                                                          | Index date                                 |                                                                                                                                                                                                                                                                                                                                         |
| Any births with an index date occurring outside of the accrual period  | MOMBABY      |                                                          | Accrual window                             | Pregnancy onset before 1 April 2002                                                                                                                                                                                                                                                                                                     |
| Any births occurring after accrual end date                            | MOMBABY      |                                                          | Accrual window                             | Births after 17 February 2018                                                                                                                                                                                                                                                                                                           |
| Not first birth                                                        | MOMBABY      |                                                          | 14 years prior to index date               | Prior record in MOMBABY within past 14 years of index date                                                                                                                                                                                                                                                                              |
| Not first birth in accrual period                                      | MOMBABY      |                                                          | Accrual window                             | Subsequent records in MOMBABY                                                                                                                                                                                                                                                                                                           |

**Neighbourhood material deprivation and severe maternal morbidity: A population-based cohort study in Ontario, Canada**  
*Snelgrove JW et al.*

**Outcome**

| Concept                         | Data Sources | Code Type     | Window                                                                                                                                           | Notes<br>(including Dataset references)                                                                                                                                                                                                                                                                                                                                                                                                                                                                                                                                                                                                                                                                                                                                                                                                                                                                                                                                                                                                                                                                                                                                                                                                                                                                                                                                                                                                                                                                                                                                                                                                                                                                                                                                                                                        |
|---------------------------------|--------------|---------------|--------------------------------------------------------------------------------------------------------------------------------------------------|--------------------------------------------------------------------------------------------------------------------------------------------------------------------------------------------------------------------------------------------------------------------------------------------------------------------------------------------------------------------------------------------------------------------------------------------------------------------------------------------------------------------------------------------------------------------------------------------------------------------------------------------------------------------------------------------------------------------------------------------------------------------------------------------------------------------------------------------------------------------------------------------------------------------------------------------------------------------------------------------------------------------------------------------------------------------------------------------------------------------------------------------------------------------------------------------------------------------------------------------------------------------------------------------------------------------------------------------------------------------------------------------------------------------------------------------------------------------------------------------------------------------------------------------------------------------------------------------------------------------------------------------------------------------------------------------------------------------------------------------------------------------------------------------------------------------------------|
| Severe maternal morbidity (SMM) | DAD          | ICD 10<br>CCI | Start of lookback period ("pregnancy onset" = index date – gestational age at birth) to end of observation window (42 days following index date) | <p>Patient considered to have outcome IF ANY code in ANY of the following:</p> <ol style="list-style-type: none"> <li>1) Obstetric/ ill-defined or sudden death</li> <li>2) Hypertensive heart/renal disease</li> <li>3) Eclampsia</li> <li>4) Cerebral venous thrombosis</li> <li>5) Complications of anaesthesia – non-cardiac</li> <li>6) Complications of anaesthesia – cardiac</li> <li>7) Cardiac diseases (cardiac arrest, infarction, failure, pulmonary edema)</li> <li>8) Placental abruption c/ coagulation defect</li> <li>9) Antepartum hemorrhage c/ coagulation defect</li> <li>10) Intrapartum hemorrhage c/ coagulation defect</li> <li>11) Uterine rupture – before labour</li> <li>12) Uterine rupture – during labour</li> <li>13) Obstetric shock (including septic shock)</li> <li>14) Septecemia during labour</li> <li>15) Puerperal sepsis</li> <li>16) Pulmonary embolism</li> <li>17) Obstetric embolism</li> <li>18) Cardiomyopathy</li> <li>19) Acute renal failure</li> <li>20) HIV disease</li> <li>21) Cerebrovascular disease</li> <li>22) Acute respiratory distress syndrome</li> <li>23) Acute abdomen</li> <li>24) Hepatic failure</li> <li>25) Acute psychosis</li> <li>26) Cerebral edema, coma</li> <li>27) Disseminated intravascular coagulation</li> <li>28) Sickle cell anemia crisis</li> <li>29) Status asthmaticus</li> <li>30) Status epilepticus</li> <li>31) Assisted ventilation (endotracheal tube or tracheostomy)</li> <li>32) Caesarean hysterectomy</li> <li>33) Postpartum hysterectomy</li> <li>34) Dialysis</li> <li>35) Evacuation of incisional hematoma</li> <li>36) Surgical repair of bladder, urethra, intestine</li> <li>37) Intrapartum hemorrhage with no coagulation defect AND blood transfusion</li> <li>38) Postpartum hemorrhage AND blood</li> </ol> |

Neighbourhood material deprivation and severe maternal morbidity: A population-based cohort study in Ontario, Canada

Snelgrove JW et al.

|  |  |  |  |                                                                                                                                                                                                                                                                                                                |
|--|--|--|--|----------------------------------------------------------------------------------------------------------------------------------------------------------------------------------------------------------------------------------------------------------------------------------------------------------------|
|  |  |  |  | <div>transfusion</div> <div>39) Placenta previa AND blood transfusion</div> <div>40) Embolization/ ligation/ suturing AND postpartum hemorrhage</div> <div>See:</div> <div>Joseph KS et al, 2009,<sup>1</sup> Joseph KS et al, 2010,<sup>2</sup> ICD-10CA, 2009,<sup>3</sup> and CCHI, 2012.<sup>4</sup></div> |
|--|--|--|--|----------------------------------------------------------------------------------------------------------------------------------------------------------------------------------------------------------------------------------------------------------------------------------------------------------------|

**Neighbourhood material deprivation and severe maternal morbidity: A population-based cohort study in Ontario, Canada**  
*Snelgrove JW et al.*

**Study exposures, covariates**

| Concept                    | Data Sources   | Code Type                 | Window                       | Notes<br>(including Dataset references)                                                                                                                                                                                                                                                                                                                                                 |
|----------------------------|----------------|---------------------------|------------------------------|-----------------------------------------------------------------------------------------------------------------------------------------------------------------------------------------------------------------------------------------------------------------------------------------------------------------------------------------------------------------------------------------|
| Age                        | RPDB           |                           | Index date                   |                                                                                                                                                                                                                                                                                                                                                                                         |
| Index year                 | DAD            |                           | Index date                   |                                                                                                                                                                                                                                                                                                                                                                                         |
| Material deprivation index | ONMARG         |                           | Index date                   | Ontario Marginalization Index, Material Deprivation, in quintiles.<br><br>Use version of ONMARG closest to year of index date:<br>2001 for 2002-2003<br>2006 for 2004-2018<br>See:<br><a href="https://datadictionary.ices.on.ca/Applications/DataDictionary/Library.aspx?Library=ONMARG">https://datadictionary.ices.on.ca/Applications/DataDictionary/Library.aspx?Library=ONMARG</a> |
| Income quintile            | RPDB<br>Census |                           | Index date                   | Ontario Census area profile: income quintile.<br><br>Use Census closest to year of index date:<br>2001 for 2002-2003<br>2006 for 2004-2018<br>See:<br><a href="https://datadictionary.ices.on.ca/Applications/DataDictionary/Library.aspx?Library=CENSUS">https://datadictionary.ices.on.ca/Applications/DataDictionary/Library.aspx?Library=CENSUS</a>                                 |
| Rurality                   | RPDB           |                           | Index date                   | Rurality Index for Ontario (RIO).<br>Use version of RIO closest to year of index date:<br>RIO2004 for 2002-2006<br>RIO2008 for 2007-2018                                                                                                                                                                                                                                                |
| Gestational age at birth   | MOMBABY        |                           | Index date                   |                                                                                                                                                                                                                                                                                                                                                                                         |
| Induction of labour        | DAD            | CCI code                  | Within index hospitalization | Canadian Classification of Health Interventions (CCI)                                                                                                                                                                                                                                                                                                                                   |
| Epidural                   | DAD<br>OHIP    | CCI code<br>OHIP fee code | Within index hospitalization | Canadian Classification of Health Interventions (CCI); Ontario Health Insurance Plan Claims Database (OHIP)                                                                                                                                                                                                                                                                             |
| Delivery mode              | DAD            | CCI code                  | Within index hospitalization |                                                                                                                                                                                                                                                                                                                                                                                         |
| Multiple gestations        | MOMBABY        |                           | Within index hospitalization |                                                                                                                                                                                                                                                                                                                                                                                         |
| Stillbirth                 | MOMBABY        |                           | Within index hospitalization |                                                                                                                                                                                                                                                                                                                                                                                         |
| Immigration status         | IRCC           |                           | Index date                   | Immigration, Refugees and Citizenship                                                                                                                                                                                                                                                                                                                                                   |

Neighbourhood material deprivation and severe maternal morbidity: A population-based cohort study in Ontario, Canada

Snelgrove JW et al.

|  |  |  |  |                                                                                                                                                                                                                                                                                                       |
|--|--|--|--|-------------------------------------------------------------------------------------------------------------------------------------------------------------------------------------------------------------------------------------------------------------------------------------------------------|
|  |  |  |  | Canada (IRCC)’s Permanent Resident Database<br><br>Number of years since arrived in Ontario.<br>See:<br><a href="https://datadictionary.ices.on.ca/Application/s/DataDictionary/Library.aspx?Library=CIC">https://datadictionary.ices.on.ca/Application/s/DataDictionary/Library.aspx?Library=CIC</a> |
|--|--|--|--|-------------------------------------------------------------------------------------------------------------------------------------------------------------------------------------------------------------------------------------------------------------------------------------------------------|

References

1. Joseph KS, Fahey J, Canadian Perinatal Surveillance S. Validation of perinatal data in the Discharge Abstract Database of the Canadian Institute for Health Information. *Chronic Diseases in Canada*. 2009;29:96-100.

2. Joseph KS, Liu S, Rouleau J, et al. Severe maternal morbidity in Canada, 2003 to 2007: surveillance using routine hospitalization data and ICD-10CA codes. *Journal of Obstetrics & Gynaecology Canada: JOGC*. 2010;32:837-46.

3. *International Statistical Classification of Diseases and Related Health Problems. 10th Revision. ICD-10CA*: Canadian Institute for Health Information;2009.

4. *Canadian Classification of Health Interventions*. Ottawa: Canadian Institute for Health Information;2012.
