# Supplementary material for: Neighbourhood material deprivation and severe maternal morbidity: a population-based cohort study in Ontario, Canada
Source: HighWire-hosted journal article supplement (doi:10.1136/bmjopen-2020-046174), 2021-10-01
Supplement: bmjopen-2020-046174supp003_data_supplement.pdf [file bmjopen-2020-046174supp003_data_supplement.pdf]

**Supplementary table 1. Four-year average SMM rates per 1,000 births by age and by material deprivation, and rate change over study period.**

| Variable                    | SMM rates by cohort <sup>a</sup> |       |       |       | SMM rate change, cohort 4 vs 1 <sup>a</sup> |                      |
|-----------------------------|----------------------------------|-------|-------|-------|---------------------------------------------|----------------------|
|                             | 1                                | 2     | 3     | 4     | Rate difference (95% CI)                    | Rate ratio (95% CI)  |
| Overall study population    | 17.10                            | 16.55 | 18.94 | 19.82 | 2.72 (1.96, 3.49)***                        | 1.16 (1.11, 1.21)*** |
| <i>Maternal age (years)</i> |                                  |       |       |       |                                             |                      |
| <20                         | 17.54                            | 17.22 | 17.97 | 20.34 | 2.80 (-0.43, 6.04)                          | 1.15 (0.98, 1.37)    |
| 20-24                       | 14.80                            | 13.47 | 16.32 | 16.40 | 1.60 (-0.15, 3.35)                          | 1.11 (0.99, 1.24)    |
| 25-29                       | 15.26                            | 14.40 | 16.37 | 16.42 | 1.15 (-0.77, 2.39)                          | 1.08 (0.99, 1.16)    |
| 30-34                       | 17.58                            | 17.10 | 19.21 | 20.16 | 2.58 (1.18, 3.97)*                          | 1.15 (1.06, 1.23)*   |
| 35-39                       | 23.31                            | 23.35 | 25.23 | 25.67 | 2.36 (-0.16, 4.88)                          | 1.10 (0.99, 1.22)    |
| ≥40                         | 27.78                            | 28.68 | 37.30 | 42.48 | 14.69 (7.96, 21.43)*                        | 1.53 (1.24, 1.89)*   |
| <i>Material deprivation</i> |                                  |       |       |       |                                             |                      |
| Quintile 1 (least)          | 16.05                            | 16.58 | 19.36 | 18.41 | 2.36 (2.31, 2.41)***                        | 1.15 (1.14, 1.15)*** |
| Quintile 2                  | 16.36                            | 15.97 | 16.17 | 18.52 | 2.16 (2.11, 2.22)***                        | 1.13 (1.13, 1.14)*** |
| Quintile 3                  | 17.46                            | 15.73 | 18.34 | 18.99 | 1.54 (1.48, 1.59)***                        | 1.09 (1.08, 1.09)*** |
| Quintile 4                  | 16.49                            | 16.37 | 19.19 | 20.18 | 3.69 (3.63, 3.74)***                        | 1.22 (1.22, 1.23)*** |
| Quintile 5 (most)           | 18.14                            | 17.32 | 20.78 | 22.32 | 4.19 (4.13, 4.24)***                        | 1.23 (1.22, 1.23)*** |

<sup>a</sup>cohort 1: 1 April 2002 to 31 March 2006; cohort 2: 1 April 2006 to 31 March 2010; cohort 3: 1 April 2010 to 31 March 2014; cohort 4: 1 April 2014 to 31 March 2018

\*p<0.05, \*\*p<0.01, \*\*\*p<0.001
